# Supplementary material for: An indicator-based approach to assess sustainability of port-cities and marine management in the Global South
Source: Frontiers journal article supplement (doi:10.3389/fmars.2023.1052128), 2023-03-15
Supplement: Data_Sheet_1.zip [file Data_Sheet_1.zip]

Supplementary Material

#
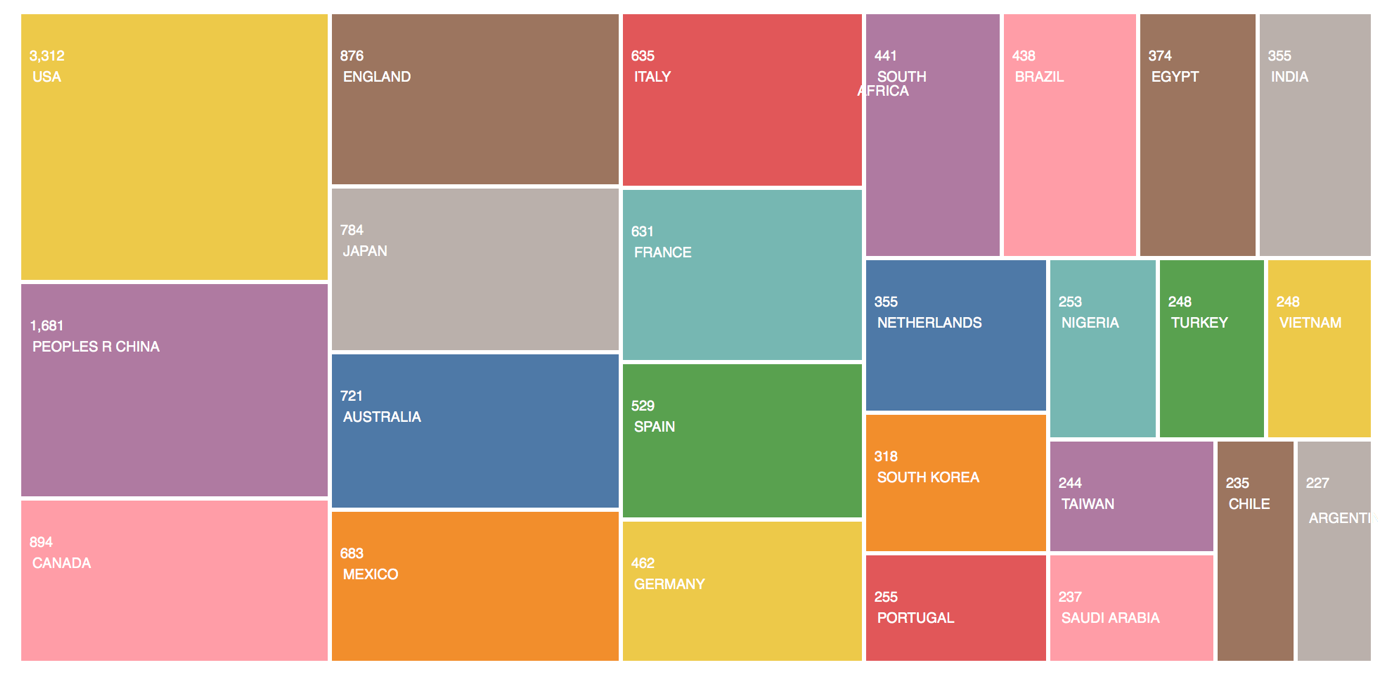


Supplementary Figure 1: Publication on Port-city Systems by Country

Supplementary Figure 2: Publication on Marine Sustainability by Country


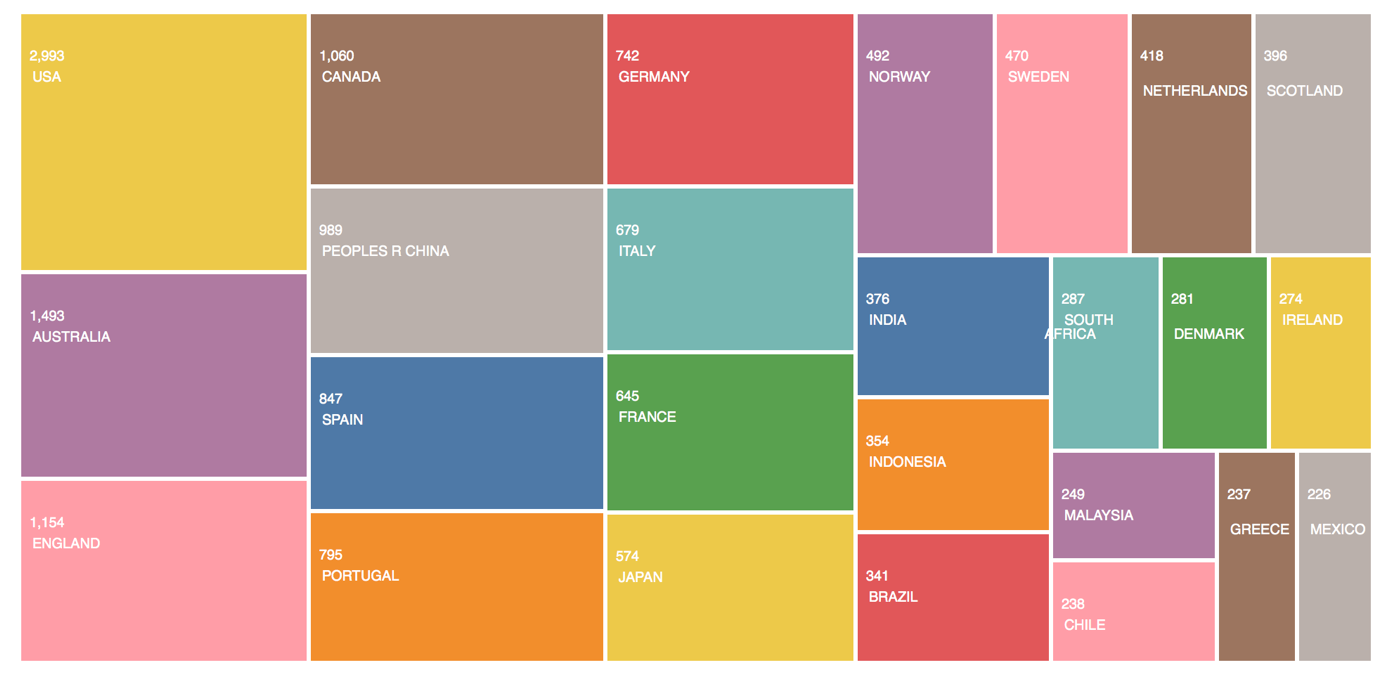


Source: Authors Construction

**Supplementary Figure 3: Disaggregated DPSIR Sustainable port city indicator frameworks**

(Attached separately for visibility)

3a. “Annual Conatiner Port Throughput” DPSIR port city indicator framework

3b. “Rate of port-expansion (land surface of port)” DPSIR port city indicator framework

3c. “Maximum berth length ” DPSIR port city indicator framework

3d. “National economy based in port and shipping industries” DPSIR port city indicator framework

3e. “Port- related employment” DPSIR port city indicator framework

3f. “Tourism Direct Gross Domestic Product” DPSIR port city indicator framework

3g. “Port-city economy based on offshore fisheries” DPSIR port city indicator framework

3h. “Port-city economy based on nearshore fisheries” DPSIR port city indicator framework

3i. “GDP annual growth rate” DPSIR port city indicator framework

3j. “No. of maritime heritage protection and culture preservation enterprises” DPSIR port city indicator framework

3k. “Port-city urbanized area” DPSIR port city indicator framework

3l. “Annual Containerization rate” DPSIR port city indicator framework
