# Supplementary material for: An indicator-based approach to assess sustainability of port-cities and marine management in the Global South
Source: Frontiers journal article supplement (doi:10.3389/fmars.2023.1052128), 2023-03-15
Supplement: Table_1.XLSX [file Table_1.XLSX]

## Sheet: Sheet1
Dimension	Indicator	Unit	Definition	Reference/Source	Linkage to SDG and Specific Targets	Data sources	Additonal Information
SOCIO-ECONOMY	DRIVERS
	Annual Container port throughput	Million TEU	Total number of containers handled by a port, per country annually, expressed in twenty-foot equivalent units (TEUs)	https://www.sesric.org/baseind-indicator-detail.php?ind_code=2335&KeepThis=true&TB_iframe=true&height=150&width=400		Literature
	% Rate of port expansion	Square Kilometers	Capacity adjustments of ports at certain points in time to cater for the increase in demand for port surfaces and in depth water areas for ships.	https://www.researchgate.net/publication/339117196_Container_port_expansion_towards_the_sea_in_the_context_of_maritime_spatial_planning		Remote Sensing
	Maximum berth length	Meters	The vertical distance of a place in which a vessel is moored or secured; place alongside a quay where a ship loads or discharges cargo.	Port Reform Tool Kit (https://ppiaf.org/sites/ppiaf.org/files/documents/toolkits/Portoolkit/Toolkit/glossary.html)		Litreature
	% National economy based in port and shipping industries	Kenyan Shillings/ US Dollars	This entails the share of contribution of the port and shipping industry to the national economic growth			Literature
	% Port-related employment	Percentage of total employment	The percentage of labor force permently employed to undertake all forms of cargo handling in a port zone, including the stuffing and stripping of containers, the loading and unloading of inland waterway vessels, lorries, and railway wagons, and the storage and semi-industrial processing of goods in warehouses and logistics areas	https://porteconomicsmanagement.org/pemp/contents/part3/port-labor/		Economic survey
	% Port -city economy based on nearshore fishing	Kenyan Shillings/ US Dollars	The amount economic contribution of nearshore fishing in port-cities			Literature
	Tourism Direct GDP	Kenyan Shillings/ US Dollars	The part of GDP generated by all industries directly in contact with coastal tourism including hotel industry, eco-tourism etc	OECD (https://data.oecd.org/industry/tourism-gdp.htm#:~:text=Tourism%20direct%20GDP%20corresponds%20to,or%20a%20percentage%20of%20GVA)		Literature
	% Port-city economy based on offshore fishing	Kenyan Shillings/ US Dollars	The amount economic contribution of offshore fishing activities in port-cities			Literature
	% GDP annual growth rate	Kenyan Shillings/ US Dollars	The annual average rate of change of the gross domestic product (GDP) at market prices based on constant local currency, for a given national economy, during a specified period of time.	World Health Organization (https://www.who.int/data/gho/indicator-metadata-registry/imr-details/1146#:~:text=Definition%3A,a%20specified%20period%20of%20time.)		Literature
	No. of maritime heritage protection and culture preservation enterprises	Individual Initiatives	The number of inititatives to protect and conserve maritime objects, historic ships, shipwrecks, bridges and maritime cultural landscapes whose preservation and valorisation brings economic benefits through sustainable tourism.	https://www.interregeurope.eu/find-policy-solutions/stories/maritime-cultural-heritage		Literature
	Port-City urbanized area	Square Kilometers	This refers to the built up area of a port-city, with a high population density and supply of infrastructural services	https://en.wikipedia.org/wiki/Urban_area		Literature
	Annual Containerisation rate (%)	Million TEU	This entails the yearly rate of use of containers to transport freight in a country attributed to factors such as transshipment, economic growth, automation etc	https://transportgeography.org/contents/chapter5/intermodal-transportation-containerization/containerization-growth-factors/		Literature
	PRESSURES
ENVIRONMENT	Volume of untreated ballast water emitted	Cubic meters	This is untreated fresh or salt watertaken onboard by ships for stability and can contain thousands of aquatic or marine microbes, plants and animals, which are then carried across the globe and released at the ship’s destination, which could potentially introduce a new invasive marine species.	https://knowledgeofsea.com/ballast-water-convention/ ; https://www.invasivespeciesinfo.gov/subject/ballast-water		Literature
	Volume of industrial wastewater discharge	Cubic meters	Volume of any water that has been adversely affected in quality by anthropogenic influence and comprises liquid waste discharged from industrial sources and may contain pollutants whivh could affect the quality of receiving waters or interfere with publicly owned treatment works.	UNEP (https://www.unep.org/cep/wastewater-sewage-and-sanitation)/ United States Environmental Protection Agency (https://www.epa.gov/npdes/industrial-wastewater)		Literature
	Volume of raw sewage emitted from port -city	Cubic meters	Volume of untreated domestic, industrial or commercial waste water generated from a port city	OECD/ https://stats.oecd.org/glossary/detail.asp?ID=2242		Literature
	C02 emmisions per capita g/kg	Metric tonness per capita	Carbon dioxide emissions stemming from the burning of fossil fuels and the manufacture of cement. They include carbon dioxide produced during consumption of solid, liquid, and gas fuels.	The World Bank/ https://databank.worldbank.org/metadataglossary/world-development-indicators/series/EN.ATM.CO2E.PC		Literature
	Volume of traffic on coastal motorways and major roads	Passenger Car Unit (PCU).	The number of vehicles passing through a road over a period of time	https://esurveying.net/transportation-engineering-software/traffic-volume-count-description#:~:text=Traffic%20Volume%20Count%20is%20counting,Passenger%20Car%20Unit%20(PCU).		Literature
	Ship CO2 emissions (port and anchoring)	Metric tonnes	This entails the propotion of Co2 emissions stemming ship anchoring and port activities			Literature
	Air Quality Index (PM 2.5 and PM10 pollutants)	AQI	This is used for reporting daily air quality. It determines the amount of pollutants in the air and how clean the air is, and what associated health effects might be a concern.The higher the AQI value, the greater the level of air pollution and the greater the health concern	https://www.weather.gov/safety/airquality-aqindex/ https://www.airnow.gov/aqi/aqi-basics/#:~:text=Think%20of%20the%20AQI%20as,300%20represents%20hazardous%20air%20quality.		Literature
	Volume of sediments/silt from dredging activities	Cubic meters	Estimated amount of sediments derived from sea beds/ harbors to increase or maintain the depth of navigation channels, anchorages, or berthing areas			RS
	% rate of change to protected areas	Square Kilometers	Modifications in a geographical space, recognised, dedicated and managed, through legal means to achieve the long term conservation of nature with associated ecosystem services and cultural values.	International Union for Conservation of Nature/ https://www.iucn.org/theme/protected-areas/about		RS
	% Population growth rate	Percentage	The annual average rate of change of population size, for a given country, territory, or geographic area, during a specified period. It expresses the ratio between the annual increase in the population size and the total population for that year, usually multiplied by 100.	https://www.who.int/data/gho/indicator-metadata-registry/imr-details/1120		Literature
	% Annual rate of overfishing	Metric tonnes	The rate of removal of a species of fish from water bodies at a rate greater than that the species can replenish its population naturally resulting in underpopulation of a species.	https://en.wikipedia.org/wiki/Overfishing		Literature
	Number of red list coastal area species	Metric tonnes	This entails the number of threatened species which are considered Critically Endangered, Endangered or Vulnerable. Criteria that result in taxa being categorised as threatened relate to the reduction in size of their populations, their geographic range, existing population sizes, and the probability of their extinction in the wild over a given time period.	IUCN Red List/ Threatened Marine Species by Matthew D. Richmond		LR
	Proportion of agricultural land farmed intensively	Square Kilometers	Total Area of land where higher levels of input and output per unit of agricultural land area is undertaken, characterized by a low fallow ratio, higher use of inputs such as capital and labour, and higher crop yields per unit land area.	https://en.wikipedia.org/wiki/Intensive_farming#:~:text=Intensive%20agriculture%2C%20also%20known%20as,unit%20of%20agricultural%20land%20area.		RS
	Area converted from non-developed to developed land uses	Square Kilometers	Portion of area where land-use has changed from agricultural or natural land to residential, industrial, infrastructure and other developments causing the loss of biodiversity, such as the agricultural/natural soil, and the relative natural, cultural and landscape resources.	Senes, G., Fumagalli, N., Ferrario, P.S., Rovelli, R. and Sigon, R., 2020. Definition of a Land Quality Index to preserve the best territories from future land take. An application to a study area in Lombardy (Italy). Journal of Agricultural Engineering, 51(1), pp.43-55.		RS
	% Rate of land-use intensity	Percentage	Quantifies the impacts of human activities on natural ecosystems. It serves as a measurement for assessing land use sustainability.	Yang, Y., Wang, L., Cao, Z., Mou, C., Shen, L., Zhao, J. and Fang, Y., 2017. CO2 emissions from cement industry in China: A bottom-up estimation from factory to regional and national levels. Journal of Geographical Sciences, 27(6), pp.711-730.		RS
	% built-up land by distance from coastline	Kilometers	Depicts the extent to which the coast has been built-up over a certain period by indicating the degree of pressure on the coast, development patterns, and the likelihood of further future changes	http://www.corpi.ku.lt/SDI-4-SEB/sif/SIF_02.pdf		RS
	Vol of solid waste generated in port-city	Cubic meters	The estimated amount of waste created by residences or businesses in a city over a certain amount of time which includes all materials discarded, whether or not they are later recycled or disposed in a landfill.	https://www2.calrecycle.ca.gov/wastecharacterization/general/rates		Literature
	Total area of reclaimed land in port-city	Square Kilometers	This entails the propotion of port city land created from sea through hydraulic filling for new ports development, widening access channels, berthing places and settlements to meet the needs of growing trade and economy.	Stauber, J.L., Chariton, A. and Apte, S., 2016. Global change. In Marine Ecotoxicology (pp. 273-313). Academic Press.		RS
	Annual passenger/cruiseships docked	Number	This entails the total number of passenger or cruiseships arriving and departing a port in a year			Literature
	STATES
SOCIO-ECOLOGY	Total Area protected for marine conservation	Square Kilometers	Refers to the propotion of clearly defined geographical space, recognised, dedicated and managed through legal or other effective means, to chieve the long term conservation of nature with associated ecosystem services and cultural values	Local Ocean Conservation, 2018/ https://localocean.co/marine-protected-areas/#:~:text=MPA's%20are%20areas%20that%20have,as%20well%20as%20marine%20biodiversity.		Literature
	Total area of semi-natrual habitats (mangrove/coral reefs/sea grass beds)	Hectares	An ecosystem with most of its processes and biodiversity intact, though altered by human activity in strength or abundance relative to the natural state.	Intergovernmental Science-Policy Platform on Biodiversity and Ecosystem Services		Literature
	% Ocean Marine Litter	Tonnes	Refers to any persistent, manufactured or processed solid material discarded, disposed of or abandoned in the marine and coastal environment. Marine litter consists of items that have been made or used by people and deliberately discarded into the sea or rivers or on beaches; brought indirectly to the sea with rivers, sewage, storm water or winds; accidentally lost, including material lost at sea…	UNEP/ https://www.unep.org/explore-topics/oceans-seas/what-we-do/working-regional-seas/marine-litter
	Annual fish landing	Tonnes	Refer to the catches of marine fish landed in foreign or domestics ports, which are subject to changes in market demand and prices as well as the need to rebuild stocks to maximum sustainable yield levels in order to achieve long-term sustainable use of marine resources	OECD/ https://data.oecd.org/fish/fish-landings.htm		Literature
	Number of species per habitat type	individuals species per unit area	The number of individuals per species found in specific coastal habitats such as mangroves, salt marshes, seagrass meadows, and coral reefs.			Literature
	% Port cargo carried by road	TEU	This entails the share of port cargo transported through road (to and from the hinterlands)	Arvis, J.F., Vesin, V., Carruthers, R. and Ducruet, C., 2018. Maritime networks, port efficiency, and Hinterland connectivity in the Mediterranean. World Bank Publications.		Literature
	% Port cargo carried by rail	TEU	This entails the propotion of freight in ports transported through rail (to and from the hinterlands)	Arvis, J.F., Vesin, V., Carruthers, R. and Ducruet, C., 2018. Maritime networks, port efficiency, and Hinterland connectivity in the Mediterranean. World Bank Publications.		Literature
	Green space area per capita	square meters per capita	This refers to the Green area per million people and city population data	HUMANITARIAN DATA EXCHANGE/ https://data.humdata.org/dataset/green-area-per-capita-square-meters-per-capita#:~:text=United%20Nations%20Human%20Settlement%20Programmes,population%20data%20source%20from%20OECD.		RS
	Number of city parks	Square Kilometers/ hectares	These refer to the number city-owned or operated parks and any improved or unimproved trails or open spaces, golf courses, beaches, playgrounds, shelters, restrooms, indoor facilities, athletic fields and parking lots, within the boundary of a City-owned or operated park			Literature
	Port-city life expectancy at birth	No of years	Indicates the number of years a newborn infant would live if prevailing patterns of mortality at the time of its birth were to stay the same throughout its life in a port city.	The World Bank/ https://databank.worldbank.org/metadataglossary/world-development-indicators/series/EN.ATM.CO2E.PC
	% Population size of port city	number of people per square km	De facto population living in areas classified as cities according to the criteria used by each area or country. Data refer to 1 July of the year indicated and are presented in thousands.	UN Department of Economic and Social Affairs Population Dynamics/		Literature
	Length(Km) of effective (hinterland links) road connection to port	Kilometers	Distance of road connection between ports and hinterlands			Literature
	Status of nearshore fish stock %	metric tonnes	This determines the fish population at the nearshore to evaluate the exploitation trends			Literature
	Length (Km)of effective (hinterland links) rail connection to port	Kilometers	Distance of rail connection between ports and hinterlands			Literature
	% Rate of urbanization	Percentage	The rate at which cities grow characterized by high population size, land use changesincreased spatial development	DESA, U., 2014. World urbanization prospects: the 2014 revision, highlights (ST/ESA/SER. A/352). UNDESA, New York.		Literature
	Number of extreme weather events	Time (minute, hour,day, week, month or year)	These are occurrences of unusually severe weather or climate conditions that can cause devastating impacts on communities and agricultural and natural ecosystems. Weather-related extreme events are often short-lived and include heat waves, freezes, heavy downpours, tornadoes, tropical cyclones and floods	Climate Hubs: US Department of Agriculture/ https://www.climatehubs.usda.gov/content/extreme-weather		Literature
	IMPACTS
	% Annual change of mangrove/coral reef/sea grass cover	Hectares/Square Kilometers	This entails loss and degradation of mangroves, coral reef and sea grass cover in coastal regions due to overharvesting of wood products, human settlement, overfishing, pollution effects, and climate change	State of Coast Report for Kenya, 2nd Edition: Enhancing Integrated Management of Coastal and Marine Resources in Kenya		RS
	Area of coastal habitats (healthy mangrove/ coral reef/sea grass cover)	Square Kilometers	This refers to the propotion of highly productive areas, inhabited by various invertebrates and serving as essential areas for feeding, nursery, spawning and migration for commercially and ecologically important fish species.	Henseler, C., Nordström, M.C., Törnroos, A., Snickars, M., Pecuchet, L., Lindegren, M. and Bonsdorff, E., 2019. Coastal habitats and their importance for the diversity of benthic communities: a species-and trait-based approach. Estuarine, Coastal and Shelf Science, 226, p.106272.		RS
	% Annual rate of coastal erosion	kilograms per year	Refers to the process by which local sea level rise, strong wave action, and coastal flooding wear down or carry away rocks, soils, and/or sands along the coast.	https://toolkit.climate.gov/topics/coastal-flood-risk/coastal-erosion#:~:text=Coastal%20erosion%20is%20the%20process,or%20sands%20along%20the%20coast.		RS
	Nearshore coastline water quality	Ph; Degree celcius; mg/l or µg/l.	Quality of water in the indefinate zone extending seaward from the shoreline/ the area where the current system is primarily caused by the wave action	United States Environmental Protection Agency		RS
	% Rate of Eutrophication	ug/l (micrograms per liter), or ppb (parts per billion)	Rate of pollution that occurs when a lake or stream becomes over-rich in plant nutrient; as a consequence it becomes overgrown in algae and other aquatic plants. The plants die and decompose. In decomposing the plants rob the water of oxygen and the lake, river or stream becomes lifeless. Nitrate fertilizers which drain from the fields, nutrients from animal wastes and human sewage are the primar…	European Environmental Agency/ https://www.eea.europa.eu/archived/archived-content-water-topic/wise-help-centre/glossary-definitions/eutrophication		Literature
	% Annual fish by-catch	metric tonnes	Amount of discarded catch of marine species and unobserved mortality due to a direct encounter with fishing vessels and gear.” These unintentionally caught animals often suffer injuries or die	Our World Data/ https://ourworldindata.org/grapher/annual-fish-catch-taxa?country=Mackerels~Tuna~Shrimps~Forage+fish~Other+marine+fish		Literature
	% change in surface temperature	Degree celcius	This entails the changes radiative skin temperature of the land derived from solar radiation, which measures the emission of thermal radiance from the land. These changes areindicators of both the greenhouse effect and the physics of land-surface processes at local through global scales.	Khan, A., Chatterjee, S. and Weng, Y., 2021. 2-Characterizing thermal fields and evaluating UHI effects. Urban Heat Island Modeling for Tropical Climates; Khan, A., Chatterjee, S., Weng, Y., Eds, pp.37-67.		RS
	Annual projected change in sea level rise	Millimeters	Refers to the average annual global rise of the ocean surface measured from the centre of the earth, as derived from satellite observations.	Climate Knowledge Portal/ https://climateknowledgeportal.worldbank.org/country/kenya/impacts-sea-level-rise		Literature
	% Rate of Population Unemployment	% of total labor force	The share of the labor force that is without work but available for and seeking employment	The World Bank/ https://databank.worldbank.org/metadataglossary/world-development-indicators/series/EN.ATM.CO2E.PC		Literature
	% Annual change built up land	Square Kilometers	Entails the substantial compact growth patterns of a city attributed to factors such as transport, residential development, migration, high natural growth rates, public policies and land speculation.	Msuya, I., Moshi, I. and Levira, F., 2021. Land Pattern of Highly Urbanizing Cities: Change in Built-up Area, Population Density and Spatial Development of the Sprawling Dar es Salaam City. Environment and Urbanization ASIA, 12(1_suppl), pp.S165-S182.		RS
	CO2 Emissions Trucks accessing port	Kg	The share of CO2 emissions from truck operations in ports			Literature
	Rail operations Co2 emissions	Kg	The share of CO2 emissions from rail operations in port cities
	Volume of Port Green House Gases (GHG) emissions	Tonnes	The portion of GHGs emmissions from fossil-fuel combustion activities at the port entailing emmisions from ships, port operations, vehicles, and rail operations operations	NCTTA, et al., 2017. THE PORT OF MOMBASA EMISSIONS INVENTORY BASELINE REPORT. Strategies for Reduction of Particulate Matter and Black Carbon Emissions from Operations.		Literature
	Port-city number of flooding events	number of events /time	These refer to the number of occurrences when water overflows on to dry land in port cities especially during heavy rains, when ocean waves come on shore.	https://www.nssl.noaa.gov/education/svrwx101/floods/#:~:text=Flooding%20is%20an%20overflowing%20of,a%20house%20to%20the%20rooftop.		Literature
	Urban land Index	Land consumption rate/population growth rate	This represents an objective index useful to identify the areas to preserve from future land conversion, evaluating land use transformation trends, and to define and calculate quantitative thresholds based on the quality of the territory and to monitor its trend over the time.	Senes, G., Fumagalli, N., Ferrario, P.S., Rovelli, R. and Sigon, R., 2020. Definition of a Land Quality Index to preserve the best territories from future land take. An application to a study area in Lombardy (Italy). Journal of Agricultural Engineering, 51(1), pp.43-55.		RS
	Coastal City built-up index	BUI	This is the index for analysis of urban pattern using Normalized Difference Built Index and Normalized Diffrence Vegetation Index.	https://www.linkedin.com/pulse/ndvi-ndbi-ndwi-calculation-using-landsat-7-8-tek-bahadur-kshetri/		RS
GOVERNANCE	RESPONSES
	Port environmental management system/plans		Environmental management plans to govern the environmental foortprint of the port by incorporating different port pollutant monitoring, prevention, protection and control measures	https://sdgs.un.org/goals/goal12/ https://sdgs.un.org/goals/goal14	SDG 12/ Target 12.2; SDG 15/ Target 15.2, 15.9	Yes/No	Survey/ interview
	Enacted policy/plans on Integrated Coastal Zone Management and conservation e.g Policy on marine spatial planning		Integrated land sea interface plans and policies	https://sdgs.un.org/goals/goal12/ https://sdgs.un.org/goals/goal14/ https://sdgs.un.org/goals/goal15	SDG 12/ Target 12.1; SDG 14/ Target 14.c; SDG 15/ Target 15.9	Yes/No	Survey/ interview
	Green port indicator plans		Strategies and standards for development of clean and green port infrastructure	https://sdgs.un.org/goals/goal9/ https://sdgs.un.org/goals/goal12	SDG 9/Target 9.2; SDG 12/Target 12.5	Yes/No	KPA
	Dredging management zones		Regulation of on-land and offland dredging zones through issuance of permits	https://sdgs.un.org/goals/goal14	SDG 14/Target 14.1, 14.2		Port authority
	Port-City Land-Use/Zoning Development plans		Coordinated and balanced land use in port city	https://sdgs.un.org/goals/goal11	SDG 11/Target 11.3, 11.6 & 11.a	Yes/No	CG
	Port development and expansion plans		Port master plans	https://sdgs.un.org/goals/goal9/ https://sdgs.un.org/goals/goal12	SDG 9/ Target 9.1, 9.2, 9.4		Port authority
	Ballast water management plans/ certification		Proper management of ballast water by certified parties	https://sdgs.un.org/goals/goal15/ https://sdgs.un.org/goals/goal6/	SDG 6/Target 6.3 &6.5; SDG 15/ Target 15.8	Yes/No	Port authority
	Policy on Ocean conservation and sustainable use		Strategies on ocean resource utilization and conservation	https://sdgs.un.org/goals/goal14	SDG 14/Target 14.1, 14.2
	Fisheries management plans		Sustainable and regulated fishing activities	https://sdgs.un.org/goals/goal14/ https://sdgs.un.org/goals/goal15	SDG 14/Target 14.4 ; SDG 15/Target 15.5	Yes/No	KEMFRI
	Landlord port management model		Public-private partnerships in port management	https://sdgs.un.org/goals/goal17	SDG 17/Target 17.17	Yes/No	KPA
	Collaborative initiatives between public agencies, port users, private users, civil societies and land side city managers		Stakeholder management and engagements in port city planning and development that influence regulation, and synergystic relations among local, regional, national and international agencies	https://sdgs.un.org/goals/goal16/ https://sdgs.un.org/goals/goal17	SDG 16/ Target 16.6 & 16.7; SDG 17/ Target 17.17	Yes/No	Survey/ interview
	Capacity of ethics enforcement bodies		Port and City environmental regulatory and compliace authorities	https://sdgs.un.org/goals/goal16	SDG 16/ Target 16.6	Yes/No	Survey/ interview
	Enacted climate change action plans		Plans to guide and promote port city climate friendly actions and reduce GHGs emmissions	https://sdgs.un.org/goals/goal11/ https://sdgs.un.org/goals/goal13	SDG 11/Target 11.6; SDG 13/Target 13.1, 13.2, 13.b	Yes/No	LR/Interviews
	% budget given for maintaining and conserving cultural, natural urban heritage		Funding of cultural and natural urban heritage projects and initiatives	https://sdgs.un.org/goals/goal11/ https://sdgs.un.org/goals/goal17	SDG 11/Target 11.4; SDG 17/ Target 17.3, 17.19
	Coastal Tourism Development Plans and policies		Strategies to promote sustainable tourism activities and create employment opportunities	https://sdgs.un.org/goals/goal8/ https://sdgs.un.org/goals/goal12	SDG 8/Target 8.9; SDG 12/Target 12.b

## Sheet: Responses
		RESPONSES					Response	Data Sources
GOVERNANCE	SUSTAINABILITY GOAL	INDICATOR	DEFINITION	SOURCE	SDGs	TARGET
	SDG 12: Responsible consumption and production patterns SDG 14 - Life below water	Port environmental management system/plans	Environmental management plans to govern the environmental foortprint of the port by incorporating different port pollutant monitoring, prevention, protection and control measures	https://sdgs.un.org/goals/goal12	SDG 12 :Ensure sustainable consumption and production patterns	Target 12.2 - By 2030, achieve the sustainable management and efficient use of natural resources	Yes/No	Survey/ interview
				https://sdgs.un.org/goals/goal14	SDG 14: Conserve and sustainably use the oceans, seas and marine resources for sustainable development	Target 14.2 - By 2020, sustainably manage and protect marine and coastal ecosystems to avoid significant adverse impacts, including by strengthening their resilience, and take action for their restoration in order to achieve healthy and productive oceans
	SDG 12: Responsible consumption and production patterns SDG 14 - Life below water SDG 15: Life on Land	Enacted policy/plans on Integrated Coastal Zone Management and conservation e.g Policy on marine spatial planning	Integrated land sea interface plans and policies	https://sdgs.un.org/goals/goal12	SDG 12: Ensure sustainable consumption and production patterns	Target 12.1 - Implement the 10-Year Framework of Programmes on Sustainable Consumption and Production Patterns, all countries taking action, with developed countries taking the lead, taking into account the development and capabilities of developing countries	Yes/No	Survey/ interview
				https://sdgs.un.org/goals/goal14	SDG 14: Conserve and sustainably use the oceans, seas and marine resources for sustainable development	Target 14.c - Enhance the conservation and sustainable use of oceans and their resources by implementing international law as reflected in United Nations Convention on the Law of the Sea, which provides the legal framework for the conservation and sustainable use of oceans and their resources, as recalled in paragraph 158 of "The future we want
				https://sdgs.un.org/goals/goal15	SDG 15: Protect, restore and promote sustainable use of terrestrial ecosystems, sustainably manage forests, combat desertification, and halt and reverse land degradation and halt biodiversity loss	Target 15.9 - By 2020, integrate ecosystem and biodiversity values into national and local planning, development processes, poverty reduction strategies
	SDG 9: Industry, Infrastructure, and Innovation SDG 12: Responsible consumption and production patterns	Green port indicator plans	Strategies and standards for development of clean and green port infrastructure	https://sdgs.un.org/goals/goal9	SDG 9: Industry, Innovation and Infrastructure	Target 9.2 - Promote inclusive and sustainable industrialization and, by 2030, significantly raise industry’s share of employment and gross domestic product, in line with national circumstances, and double its share in least developed countries	Yes/No	KPA
				https://sdgs.un.org/goals/goal12	SDG 12: Ensure sustainable consumption and production patterns	Target 12.5 - By 2030, substantially reduce waste generation through prevention, reduction, recycling and reuse
	SDG 14 - Life below water	Dredging management zones	Regulation of on-land and offland dredging zones through issuance of permits	https://sdgs.un.org/goals/goal14	SDG 14: Conserve and sustainably use the oceans, seas and marine resources for sustainable development	Target 14.1 - By 2025, prevent and significantly reduce marine pollution of all kinds, in particular from land-based activities, including marine debris and nutrient pollution Target 14.2 - By 2020, sustainably manage and protect marine and coastal ecosystems to avoid significant adverse impacts, including by strengthening their resilience, and take action for their restoration in order to achiev…		Port authority
	SDG 11: Sustainable Cities and Communities	Port-City Land-Use/Zoning Development plans	Coordinated and balanced land use in port city	https://sdgs.un.org/goals/goal11	SDG 11: Make cities and human settlements inclusive, safe, resilient and sustainable	Target 11.3 - By 2030, enhance inclusive and sustainable urbanization and capacity for participatory, integrated and sustainable human settlement planning and management in all countries, 11.6 - By 2030, reduce the adverse per capita environmental impact of cities, including by paying special attention to air quality and municipal and other waste management& 11.a - Support positive economic, soci…	Yes/No	CG
	SDG 9: Industry, Infrastructure, and Innovation	Port development and expansion plans	Port master plans	https://sdgs.un.org/goals/goal9	SDG 9: Industry, Innovation and Infrastructure	Target 9.1 - Develop quality, reliable, sustainable and resilient infrastructure, including regional and transborder infrastructure, to support economic development and human well-being, with a focus on affordable and equitable access for all, 9.2- Promote inclusive and sustainable industrialization and, by 2030, significantly raise industry’s share of employment and gross domestic product, in li…		Port authority
	SDG 6: Clean Water and Sanitation SDG 15: Life on Land	Ballast water management plans/ certification	Proper management of ballast water by certified parties	https://sdgs.un.org/goals/goal6/	SDG 6: Clean water and sanitation	Target 6.3 - By 2030, improve water quality by reducing pollution, eliminating dumping and minimizing release of hazardous chemicals and materials, halving the proportion of untreated wastewater and substantially increasing recycling and safe reuse globally &6.5 - By 2030, implement integrated water resources management at all levels, including through transboundary cooperation as appropriate	Yes/No	Port authority
				https://sdgs.un.org/goals/goal15	SDG 15: Protect, restore and promote sustainable use of terrestrial ecosystems, sustainably manage forests, combat desertification, and halt and reverse land degradation and halt biodiversity loss	Target 15.8 - By 2020, introduce measures to prevent the introduction and significantly reduce the impact of invasive alien species on land and water ecosystems and control or eradicate the priority species
	SDG 14 - Life below water	Policy on Ocean conservation and sustainable use	Strategies on ocean resource utilization and conservation	https://sdgs.un.org/goals/goal14	SDG 14: Conserve and sustainably use the oceans, seas and marine resources for sustainable development	Target 14.1 - By 2025, prevent and significantly reduce marine pollution of all kinds, in particular from land-based activities, including marine debris and nutrient pollution Target 14.2 - By 2020, sustainably manage and protect marine and coastal ecosystems to avoid significant adverse impacts, including by strengthening their resilience, and take action for their restoration in order to achiev…
	SDG 14 - Life below water SDG 15: Life on Land	Fisheries management plans	Sustainable and regulated fishing activities	https://sdgs.un.org/goals/goal14	SDG 14: Conserve and sustainably use the oceans, seas and marine resources for sustainable development	Target 14.4 - By 2020, effectively regulate harvesting and end overfishing, illegal, unreported and unregulated fishing and destructive fishing practices and implement science-based management plans, in order to restore fish stocks in the shortest time feasible, at least to levels that can produce maximum sustainable yield as determined by their biological characteristics	Yes/No	KEMFRI
				https://sdgs.un.org/goals/goal15	SDG 15: Protect, restore and promote sustainable use of terrestrial ecosystems, sustainably manage forests, combat desertification, and halt and reverse land degradation and halt biodiversity loss	Target 15.5 - Take urgent and significant action to reduce the degradation of natural habitats, halt the loss of biodiversity and, by 2020, protect and prevent the extinction of threatened species
	SDG 17: Partnerships for the Goal	Landlord port management model	Public-private partnerships in port management	https://sdgs.un.org/goals/goal17	SDG 17: Strengthen the means of implementation and revitalize the Global Partnership for Sustainable Development	Target 17.17 - Encourage and promote effective public, public-private and civil society partnerships, building on the experience and resourcing strategies of partnerships	Yes/No	KPA
	SDG 16: Peace, Justice, and Strong Institutions SDG 17: Partnerships for the Goal	Collaborative initiatives between public agencies, port users, private users, civil societies and land side city managers	Stakeholder management and engagements in port city planning and development that influence regulation, and synergystic relations among local, regional, national and international agencies	https://sdgs.un.org/goals/goal16	SDG 16: Promote peaceful and inclusive societies for sustainable development, provide access to justice for all and build effective, accountable and inclusive institutions at all levels	Target 16.6 - Develop effective, accountable and transparent institutions at all levels & 16.7 - Ensure responsive, inclusive, participatory and representative decision-making at all levels	Yes/No	Survey/ interview
				https://sdgs.un.org/goals/goal17	SDG 17: Strengthen the means of implementation and revitalize the Global Partnership for Sustainable Development	Target 17.17 - Encourage and promote effective public, public-private and civil society partnerships, building on the experience and resourcing strategies of partnerships
	SDG 16: Peace, Justice, and Strong Institutions	Capacity of ethics enforcement bodies	Port and City environmental regulatory and compliace authorities	https://sdgs.un.org/goals/goal16	SDG 16: Promote peaceful and inclusive societies for sustainable development, provide access to justice for all and build effective, accountable and inclusive institutions at all	Target 16.6 - Develop effective, accountable and transparent institutions at all levels	Yes/No	Survey/ interview
	SDG 11: Sustainable Cities and Communities SDG 13: Climate Action	Enacted climate change action plans	Plans to guide and promote port city climate friendly actions and reduce GHGs emmissions	https://sdgs.un.org/goals/goal11	SDG 11: Sustainable Cities and Communities	Target 11.6 - By 2030, reduce the adverse per capita environmental impact of cities, including by paying special attention to air quality and municipal and other waste management	Yes/No	LR/Interviews
				https://sdgs.un.org/goals/goal13	SDG 13: Take urgent action to combat climate change and its impacts	Target 13.1 - Strengthen resilience and adaptive capacity to climate-related hazards and natural disasters in all countries, Target 13.2 - Integrate climate change measures into national policies, strategies and planning, Target 13.b - Promote mechanisms for raising capacity for effective climate change-related planning and management in least developed countries and small island developing State…
	SDG 11: Sustainable Cities and Communities SDG 17: Partnerships for the Goal	% budget given for maintaining and conserving cultural, natural urban heritage	Funding of cultural and natural urban heritage projects and initiatives	https://sdgs.un.org/goals/goal11	SDG 11: Make cities and human settlements inclusive, safe, resilient and sustainable	Target 11.4 - Strengthen efforts to protect and safeguard the world’s cultural and natural heritage
				https://sdgs.un.org/goals/goal17	SDG 17: Strengthen the means of implementation and revitalize the Global Partnership for Sustainable Development	Target 17.3 - Mobilize additional financial resources for developing countries from multiple sources, Target 17.19 - By 2030, build on existing initiatives to develop measurements of progress on sustainable development that complement gross domestic product, and support statistical capacity-building in developing countries
	SDG 8: Decent Work and economic growth SDG 12: Responsible consumption and production patterns	Coastal Tourism Development Plans and policies	Strategies to promote sustainable tourism activities and create employment opportunities	https://sdgs.un.org/goals/goal8/	SDG 8: Promote sustained, inclusive and sustainable economic growth, full and productive employment and decent work for all	Target 8.9 - By 2030, devise and implement policies to promote sustainable tourism that creates jobs and promotes local culture and products
				https://sdgs.un.org/goals/goal12	SDG 12: Ensure sustainable consumption and production patterns	Target 12.b -Develop and implement tools to monitor sustainable development impacts for sustainable tourism that creates jobs and promotes local culture and products
